1 **Transcriptomic response in symptomless roots of clubroot infected kohlrabi mirrors**  
2 **resistant plants**

3  
4 Stefan Ciaghi<sup>1,§</sup>, Arne Schwelm<sup>1,2,§</sup>, Sigrid Neuhauser<sup>1,\*</sup>

5  
6 <sup>1</sup> *University of Innsbruck, Institute of Microbiology, Technikerstraße 25, 6020 Innsbruck,*  
7 *Austria*

8 <sup>2</sup> *Swedish University of Agricultural Sciences, Department of Plant Biology, Uppsala*  
9 *BioCenter, Linnean Centre for Plant Biology, P.O. Box 7080, SE-75007 Uppsala, Sweden*

10 \* Correspondence: [Sigrid.Neuhauser@uibk.ac.at](mailto:Sigrid.Neuhauser@uibk.ac.at)

11 <sup>§</sup> Contributed equally to this work

12  
13  
14 **Abstract**

15 **Background:** Clubroot disease is caused by *Plasmodiophora brassicae* (Phytophyta,  
16 Rhizaria) and is one of the economically most important diseases of brassica crops. The  
17 formation of the typical hypertrophied roots is accompanied by altered metabolism and  
18 hormone homeostasis of infected plants. Not all roots of an infected plant show the same  
19 phenotypic changes: while some roots remain uninfected, others develop galls of diverse  
20 sizes. Aim of this study was to analyse and compare the intra-plant heterogeneity of *P.*  
21 *brassicae*, root galls and symptomless roots of the same host plants (*Brassica oleracea* var.  
22 *gongylodes*) collected from a commercial field in Austria using transcriptome analyses.

23 **Results:** Symptomless roots did show transcriptomic traits that had previously described for  
24 resistant plants: Genes involved in host cell wall metabolism or salicylic acid (SA) mediated  
25 defence response were up-regulated in symptomless roots, while being down-regulated in gall  
26 tissues. Transcriptomes between symptomless roots and gall tissue were markedly different,  
27 with those differences being in accordance with visible physiological differences between the  
28 two tissues. On the pathogen side, a secreted SA methyl transferase (PbBSMT) was one of  
29 the highest expressed genes in gall tissues.

30 **Conclusions:** Infected and uninfected roots of the same clubroot infected plant showed  
31 transcriptomic differences which were previously only observed between clubroot resistant  
32 and susceptible hosts. We provide further evidence for the biological relevance of PbBSMT  
33 which on the one hand likely causes a decrease of SA in the galls, while the PbBSMT  
34 produced Methyl-SA potentially leads to increased pathogen tolerance in uninfected roots.  
35 The here described intra-plant heterogeneity was unexpected and highlights the need for  
36 targeted analyses of clubroot interaction using cell, tissue type, organ specific probing to  
37 identify traits that prevent the formation of clubroot disease.

38  
39  
40 **Keywords:** Clubroot, Host-pathogen interaction, *Plasmodiophora brassicae*, *Brassica*  
41 *oleracea*, root transcriptome, protist

42  
43 **List of abbreviations**

44 ABA: Abscisic acid; BR: Brassinosteroids; C: Control; CDS: Coding sequence; CK:  
45 Cytokinin; COG: Clusters of Orthologous Groups; DEG: Differentially expressed gene; dpi:  
46 days post inoculation; ET: Ethylene; FDR: False discovery rate; FPKM: Fragments per  
47 kilobase per million; HR: hypersensitive response; IsoPct: Isoform percentage; JA: Jasmonic  
48 acid; MeSA: Methyl-salicylate; NCBI: National Center for Biotechnology Information; OG:  
49 Older root gall; ORF: Open reading frame; PbraAT: Austrian *P. brassicae* field population;  
50 PR: Pathogenesis related; RNA: Ribonucleic acid; SA: Salicylic acid; SAM: S-  
51 adenosylmethionine; SL: Symptomless root; TAIR: The Arabidopsis Information Resource;  
52 YG: Younger root gall.

53

54

## 55 Background

56 Clubroot disease is one of the most important diseases of Brassica crops worldwide  
57 accounting for approximately 10% loss in *Brassica* vegetable, fodder, and oilseed crops  
58 (Dixon, 2009). Clubroot is caused by *Plasmodiophora brassicae*, an obligate biotrophic  
59 protist, taxonomically belonging to Phytomyxea within the eukaryotic super-group Rhizaria  
60 (Bulman & Braselton, 2014, Neuhauser *et al.*, 2014). This soil borne pathogen has a complex  
61 life cycle: zoospores infect root hairs where primary plasmodia form. These plasmodia  
62 develop into secondary zoospores, which are released into the soil and re-infect the root  
63 cortex where secondary plasmodia develop (Kageyama & Asano, 2009). The secondary  
64 plasmodia mature into resting spores, which are released into the soil. In infected host tissue  
65 division and elongation of cells is triggered upon infection, which leads to hypertrophies of  
66 infected roots resulting in the typical root galls or clubroots (Fig. 1).  
67

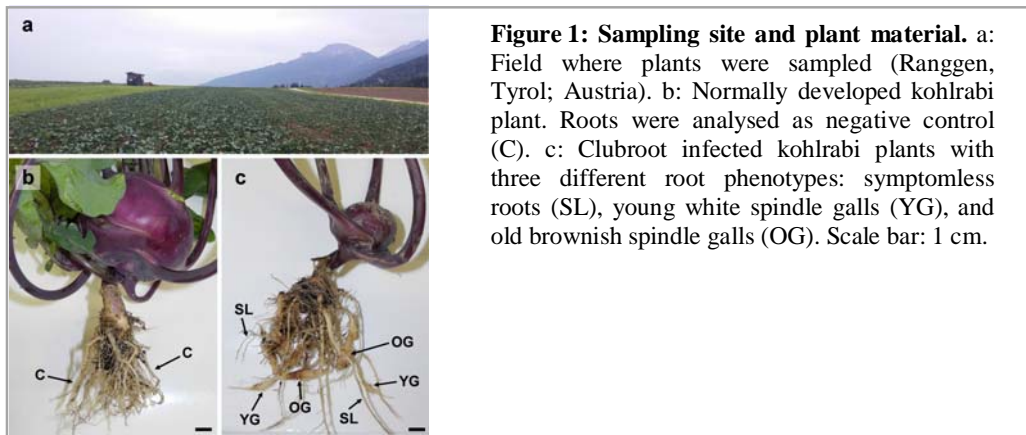

68  
69

70 *P. brassicae* can only be grown and studied in co-culture with its host. This has hampered  
71 both, targeted and large scale studies on the molecular basis of *P. brassicae* and the  
72 interaction with its host (Schwelm *et al.*, 2018). Because of the economic importance of  
73 clubroot disease, numerous studies analysed specific aspects of the biology, physiology and  
74 molecular biology of the interaction from the plant side to better understand and control the  
75 disease. The first of these experimental studies were based on the  
76 *Arabidopsis/Plasmodiophora* pathosystem (e.g. Siemens *et al.*, 2006, Devos *et al.*, 2006).  
77 During the last years not only an increasing number of *Brassica* (host) genomes became  
78 available (Wang *et al.*, 2011, Chalhoub *et al.*, 2014, Liu *et al.*, 2014, Cheng *et al.*, 2016), but  
79 also several *P. brassicae* genomes (Schwelm *et al.*, 2015, Rolfe *et al.*, 2016, Bi *et al.*, 2016,  
80 Daval *et al.*, 2018) permitting new research approaches, including targeted transcriptome  
81 studies. There are analyses of (plant) transcriptomes of whole roots of clubroot infected  
82 compared with uninfected plants (Agarwal *et al.*, 2011, Chen *et al.*, 2016a, Malinowski *et al.*,  
83 2016, Zhao *et al.*, 2017), of host varieties susceptible and tolerant to clubroot (Jubault *et al.*,  
84 2008, Chen *et al.*, 2016a), or the host response to different *P. brassicae* isolates (Siemens *et al.*,  
85 2006, Agarwal *et al.*, 2011, Lovelock *et al.*, 2013, Zhang *et al.*, 2016).

86 Plants infected with *P. brassicae* show marked physiological changes including cell wall  
87 biosynthesis, plant hormone metabolism and plant defence related processes. Expansin genes,  
88 involved in plant cell expansion and elongation (Cosgrove, 2005), were up-regulated in  
89 *P. brassicae* infected roots (Siemens *et al.*, 2006, Irani *et al.*, 2018, Agarwal *et al.*, 2011). In  
90 *P. brassicae* infected roots enzymatic activity of Xyloglucan endo  
91 Transglucosylase/Hydrolases (XTHs) increases (Devos *et al.*, 2005), while an early response  
92 to *P. brassicae* infection was up-regulation of the phenylpropanoid pathway that provides  
93 lignin precursors (Zhao *et al.*, 2017). With progression of clubroot development, the  
94 lignification of clubroot tissue was reduced (Deora *et al.*, 2013) and genes involved in

95 lignification processes were down-regulated (Cao *et al.*, 2008). On the other hand cell wall  
96 thickening and lignification was suggested to limit the spread of the pathogen in tolerant  
97 *B. oleracea* (Donald *et al.*, 2008) and *B. rapa* (Takahashi *et al.*, 2001).

98 The development of clubroot symptoms is accompanied by changes of plant hormone  
99 homeostasis (Siemens *et al.*, 2006, Ludwig-Müller *et al.*, 2009, Malinowski *et al.*, 2016).  
100 During clubroot development auxins mediate host cell divisions and elongation. Auxins  
101 increase over time during clubroot development and are accumulated in *P. brassicae* infected  
102 tissues in a sink like manner (Ludwig-Müller *et al.*, 2009). Also genes belonging to the auxin  
103 conjugating GH3 protein family are regulated differentially during clubroot development  
104 (Jahn *et al.*, 2013) with one GH3 protein gene (PbGH3; CEP01995.1) identified in the  
105 *P. brassicae* genome (Schwelm *et al.*, 2015). Cytokinins (CKs) increase initially, but  
106 decreases again with the onset of gall formation (Malinowski *et al.*, 2016). At the same time  
107 *P. brassicae* plasmodia produce minute amounts of CKs (Müller & Hilgenberg, 1986).  
108 Therefore, CKs play a crucial role in disease development not only through their regulation of  
109 cell division but also through their interference in the sugar metabolism and invertase  
110 production, which might be crucial for the nutrition of *P. brassicae* (Siemens *et al.*, 2011).

111 Stress- and defence related phytohormones like salicylic acid (SA), jasmonic acid (JA),  
112 brassinosteroids (BR), and ethylene (ET) and their regulatory pathways also change in  
113 response to pathogen infection (Kazan & Lyons, 2014). The accumulation of SA plays a key  
114 role in plant defence against biotrophic pathogens, often resulting in a localized  
115 hypersensitive response and induction of pathogenesis-related (PR) genes. Systemic acquired  
116 resistance (SAR) is a form of induced resistance that is activated by SA throughout a plant  
117 after being exposed to elicitors from microbes or chemical stimuli (Klessig *et al.*, 2018). High  
118 endogenous levels of SA and exogenous SA reduced the infection of the host by *P. brassicae*  
119 (Lovelock *et al.*, 2013, Lovelock *et al.*, 2016) and in tolerant hosts SA related genes are  
120 induced upon infection (Siemens *et al.*, 2009, Agarwal *et al.*, 2011, Zhang *et al.*, 2016). The  
121 SAR-deficient *npr1-1* and SA-deficient isochorismate synthase 1 (ICS1) *sid2 Arabidopsis*  
122 mutants showed an increased susceptibility to *P. brassicae*, whereas the *bik-1* mutant, with  
123 elevated SA levels, was more resistant (Chen *et al.*, 2016b). Pathogenesis-related (PR)  
124 defence proteins are induced by SAR and higher expressed in resistant than in susceptible  
125 *B. rapa* and *Arabidopsis* species (Chen *et al.*, 2016a, Jubault *et al.*, 2013, Jia *et al.*, 2017). Via  
126 a secreted methyltransferase (PbBSMT; AFK13134.1), *P. brassicae* might counteract the  
127 plant SA-defence. This SABATH-like methyltransferase has been shown to convert SA to  
128 methyl-salicylate (MeSA) *in vitro* (Ludwig-Müller *et al.*, 2015). The proposed function *in*  
129 *planta* is the removal of SA in local infected tissue as MeSA is volatile. *Arabidopsis* mutants  
130 expressing the PbBMST gene showed a higher susceptibility towards *P. brassicae* (Bulman *et al.*,  
131 2018).

132 The *P. brassicae* PbGH3 was also able to conjugate JA with amino acids *in vitro*  
133 (Schwelm *et al.*, 2015). In general, JA is associated with resistance against necrotrophic  
134 microbes (Pieterse *et al.*, 2012, Fu & Dong, 2013). In *A. thaliana* Col-0 several JA-responsive  
135 genes were induced in infected root tissues and JA accumulates in galls (Siemens *et al.*, 2006,  
136 Gravot *et al.*, 2012). *Jasmonate resistant 1 (jar1)* mutants, impaired in JA-Ile accumulation,  
137 showed a higher susceptibility to *P. brassicae* (Agarwal *et al.*, 2011, Gravot *et al.*, 2012).  
138 Thus, JA responses contributed to a basal resistance against some strains of *P. brassicae* in  
139 *A. thaliana* Col-0 (Gravot *et al.*, 2012). But in partially resistant *Arabidopsis* Bur-0 only weak  
140 JA responses compared with the susceptible Col-0 were found (Lemarié *et al.*, 2015).  
141 Generally, clubroot susceptible hosts show a high level of JA response, whereas it is reduced  
142 in resistant hosts (Jubault *et al.*, 2008, Chen *et al.*, 2016a). Those differences might be due to  
143 if aliphatic or aromatic glucosinolate production is induced by JA in the particular host (Xu *et al.*,  
144 2018).

145 Aim of this study was to generate the first data set of root tissue specific transcriptomic  
146 response of individual plants during clubroot development. Usually, clubroot infected plants  
147 do not develop symptoms uniformly on all root parts with some roots showing strong  
148 symptoms and others not showing symptoms at all (Fig. 1). We collected samples of kohlrabi  
149 (*Brassica oleracea* var. *gongylodes*) infected with *P. brassicae* (PbraAT) from a field in

150 Austria. We compared young and old clubroots and symptomless roots of the same infected  
151 plants and a control plant. We analysed similarities and differences of their transcriptomic  
152 profile focussing on cell wall metabolism, hormone metabolism, and defence response.  
153

## 154 **Methods**

### 155 **Sampling**

156 Kohlrabi “purple Vienna” plants with clubroots and without visible root infections were  
157 collected from a *P. brassicae* infested field in Ranggen (Tyrol, Austria;) in August 2016.  
158 Root samples from symptomless roots (SL), young white spindle galls with waxy appearance  
159 (YG) and old brownish spindle galls (OG) (Fig. 1) were taken in triplicates from three  
160 individual clubroot infected plants. Only one plant without apparent infection could be  
161 identified in the vegetable plot, which was additionally sampled as uninfected control (C)  
162 (Fig. 1). Galls and roots were thoroughly washed with tap water, before samples were taken  
163 (categories C, SL, YG, and OG), and transferred to RNA later (Ambion, Austin, TX, USA)  
164 where they were stored until RNA extraction.  
165

### 166 **RNA extraction and sequencing**

167 The outer layer of the root galls was trimmed-off and the trimmed galls and symptomless  
168 roots were snap-frozen in liquid nitrogen and transferred to 1.5 mL tubes containing RNase  
169 free zirconia beads (0.5 mm and 2 mm in diameter). Samples were homogenized using a  
170 FastPrep (MP Biomedicals, Santa Ana, CA, USA) for 40 s at 6 m s<sup>-1</sup> followed by manual  
171 grinding with pistils after repeated snap-freezing. Total RNA was extracted using the Qiagen  
172 RNeasy Plant Mini Kit (Qiagen, Hilden, Germany) according to the manufacturer’s  
173 instructions, but with an additional 80% ethanol column wash prior elution. RNA quantity  
174 and quality were determined using Agilent Bioanalyzer 2100 (Agilent Technologies, Palo  
175 Alto, CA, USA). Additional RNA quality assessment, polyA selection (SENSE mRNA-Seq  
176 Library Prep Kit; Lexogen, Vienna, Austria), library construction (10 libraries; 1x C, 3x SL,  
177 3x YG, and 3x OG) and sequencing was performed at the VBCF NGS Unit (Vienna, Austria).  
178 Sequencing was performed with on the Illumina HiSeq 2500 platform (Illumina, San Diego,  
179 CA, USA) with a strand specific paired end library (2x 125 bp) using v4 chemistry.  
180

### 181 **Bioinformatics**

182 Raw reads were quality checked using FastQC (Andrews, 2010). Illumina adapters were  
183 removed and good quality reads were kept using Trimmomatic v0.36 (sliding window 5 bp;  
184 average quality score > 20) (Bolger *et al.*, 2014). Only reads with a minimum length of 75 bp  
185 were processed further after a repeated FastQC check to confirm quality improvement. From  
186 the uninfected control library, 75% of the reads were randomly picked three times to generate  
187 pseudo-triplicates. Transcripts were *de novo* assembled using Trinity v2.2 (Grabherr *et al.*,  
188 2011) with strand specific library type (RF) and jaccard clip options. Expression estimation  
189 was performed using Trinity embedded RSEM (Li & Dewey, 2011) keeping only transcripts  
190 with more than at least one fragment per kilobase per million (FPKM > 1) and an isoform  
191 percentage (IsoPct) > 1%.

192 The assembled transcripts were blasted using BlastN (Altschul *et al.*, 1990) against the  
193 coding sequences (CDS) of *B. oleracea* (Liu *et al.*, 2014) and a custom database containing  
194 the CDS of the *P. brassicae* isolates e3 (Schwelm *et al.*, 2015) and PT3 (Rolfe *et al.*, 2016) to  
195 identify, if the transcript derived from the pathogen or host (E-value < 10<sup>-5</sup>). Transcripts with  
196 blast hits in both reference databases were analysed manually to identify their origin  
197 according to sequence identity and E-value. Transcripts with no hit in any reference were  
198 blasted (BlastP) against National Center for Biotechnology Information (NCBI) non  
199 redundant protein database and manually assigned to the corresponding species or discarded  
200 for further analysis. Transcripts with a best hit to a Brassicaceae reference sequence were  
201 assigned to the host transcriptome. Transcripts with hits to *P. brassicae* sequences were  
202 assigned to the pathogen transcriptome. Open reading frames (ORFs) were predicted using  
203 TransDecoder v3.0.1 (Haas & Papanicolaou, 2017). Only the longest ORF per transcript was

204 used for further analysis. Translated peptide sequences were annotated using the KEGG  
205 (Kyoto Encyclopedia of Genes and Genomes) Automatic Annotation Server (KAAS) (Moriya  
206 *et al.*, 2007) and eggNOG-mapper v0.99.3 (Huerta-Cepas *et al.*, 2016). Kohlrabi genes were  
207 additionally annotated using Mercator (Lohse *et al.*, 2014) with default settings. Mercator  
208 categories were used to bin predicted genes into groups. Putative secreted proteins of  
209 *P. brassicae* were predicted with Phobius v1.01 (Käll *et al.*, 2004) and SignalP v4.1 (Nielsen,  
210 2017) in combination with TMHMM v2.0 (Krogh *et al.*, 2001). Carbohydrate active enzymes  
211 were predicted using dbCAN (Yin *et al.*, 2012).

212  $\log_2$ -fold changes of differentially expressed genes (DEGs) were calculated using edgeR  
213 (Robinson *et al.*, 2010) with default settings. All DEGs with false discovery rate (FDR) <  
214 0.05 were treated as DEGs. Heatmaps for selected Mercator categories were created using R  
215 v3.3.2 (R Core Team, 2016) with the package ‘pheatmap’ v1.0.8 (Kolde, 2015) applying  
216 UPGMA clustering. Labelling of the predicted *B. oleracea* genes was done according to their  
217 homologous *A. thaliana* genes from TAIR (The Arabidopsis Information Resource) and  
218 adapted if necessary. Abundance of DEGs was visualized using the R package ‘ggplot2’  
219 v2.2.1 (Wickham, 2009).

220  
221



222 **Results**

223 **Transcriptome analyses**

224 162 million good quality reads with an average length of 125 bp were obtained from all  
 225 libraries (Additional file 2: Table S1). Including isoforms a total of 10940 genes were  
 226 predicted for *P. brassicae* and 42712 for *B. oleracea*. About 50% of the *P. brassicae* and 85%  
 227 of the kohlrabi transcripts could be functionally annotated using eggNOG-mapper. Only  
 228 0.0005% of the reads of the control plant (C) and the symptomless root samples (SL) matched  
 229 *P. brassicae* transcripts, which indicates that these roots were not infected by *P. brassicae*. In  
 230 the YG and OG libraries 23% and 33% of the reads matched *P. brassicae* (Additional file 1:  
 231 Figure S1).

232 The transcriptomes of infected plants (SL, YG, OG) contained a total of 5204 DEGs.  
 233 Compared with SL, in YG 1619 DEGs were up-regulated and 2280 were down-regulated  
 234 (Fig. 2, Additional file 2: Table S2), while in OG 942 DEGs were up- and 2571 were down-  
 235 regulated. 790 plant DEGs were assigned to the COG (Cluster of Orthologous Groups)  
 236 category “Information and Storage Processing”, 1401 to “Metabolism”, 1245 to “Cellular  
 237 Process and Signalling” and 1768 to “Poorly Characterized” by eggNOG-mapper (Fig. 2,  
 238 Additional file 2: Table S3). Only 19 plant genes were differentially expressed between OG  
 239 and YG (Additional file 2: Tables S4). Between the control plant and the three root tissue  
 240 types of the infected plants (C vs SL/YG/OG) 19230 DEGs were found (Additional file 2:  
 241 Tables S5, S6).  
 242  
 243

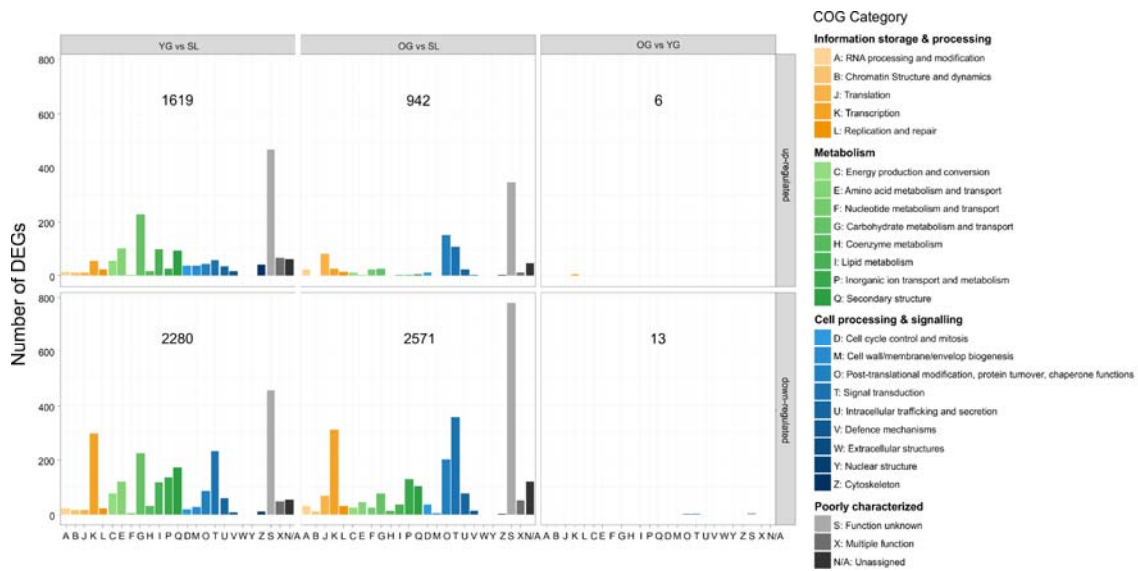

244 **Figure 2: Numbers of differentially expressed genes (DEGs) in clubroot infected kohlrabi roots**  
 245 **per COG category.** DEGs were split into up- and down-regulated genes. Total number of DEGs in  
 246 each panel is given.  
 247  
 248  
 249

250 **Plant cell wall metabolism**

251 In *B. oleracea* 161 of the 5204 DEGs within infected plants (SL vs YG vs OG) were involved  
 252 in cell wall synthesis, modification, degradation, or phenylpropanoid metabolism. Cellulose,  
 253 hemicellulose, pectin, and lignin synthesis genes were up-regulated in SL compared with  
 254 galls tissues (Fig. 3), whereas genes involved in cell wall modification and degradation were  
 255 down-regulated (Fig. 3). The changes in expression of cell wall genes were more prominent  
 256 between SL and OG than between SL and YG. In SL a UDP-D-glucuronate 4-epimerase 6  
 257 (GAE6) homolog responsible for the synthesis of UDP-D-glucuronic acid, the main building  
 258 block for pectins (Harholt *et al.*, 2010) was up-regulated compared with gall tissue. Predicted  
 259 expansin (EXP) and expansin-like (EXL) genes were mainly down-regulated in SL compared

260 with YG and OG (Fig. 3). Genes coding for XTHs were among the strongest down-regulated  
 261 DEGs in SL, with XTH24 being the strongest down-regulated transcript of all DEGs. The  
 262 phenylpropanoid pathway was up-regulated in SL compared with YG and OG (Fig. 3). This  
 263 includes the phenylalanine ammonia-lyase 1 (PAL1) homolog, a key enzyme in lignin  
 264 biosynthesis. Flavonoid metabolism was also induced in SL (Additional file 1: Figure S2).  
 265 Compared with the uninfected control plant cell wall synthesis genes were up-regulated in SL  
 266 (Additional file 1: Figure S3). XTH genes were up-regulated in YG and OG compared with  
 267 the uninfected control plant.  
 268  
 269

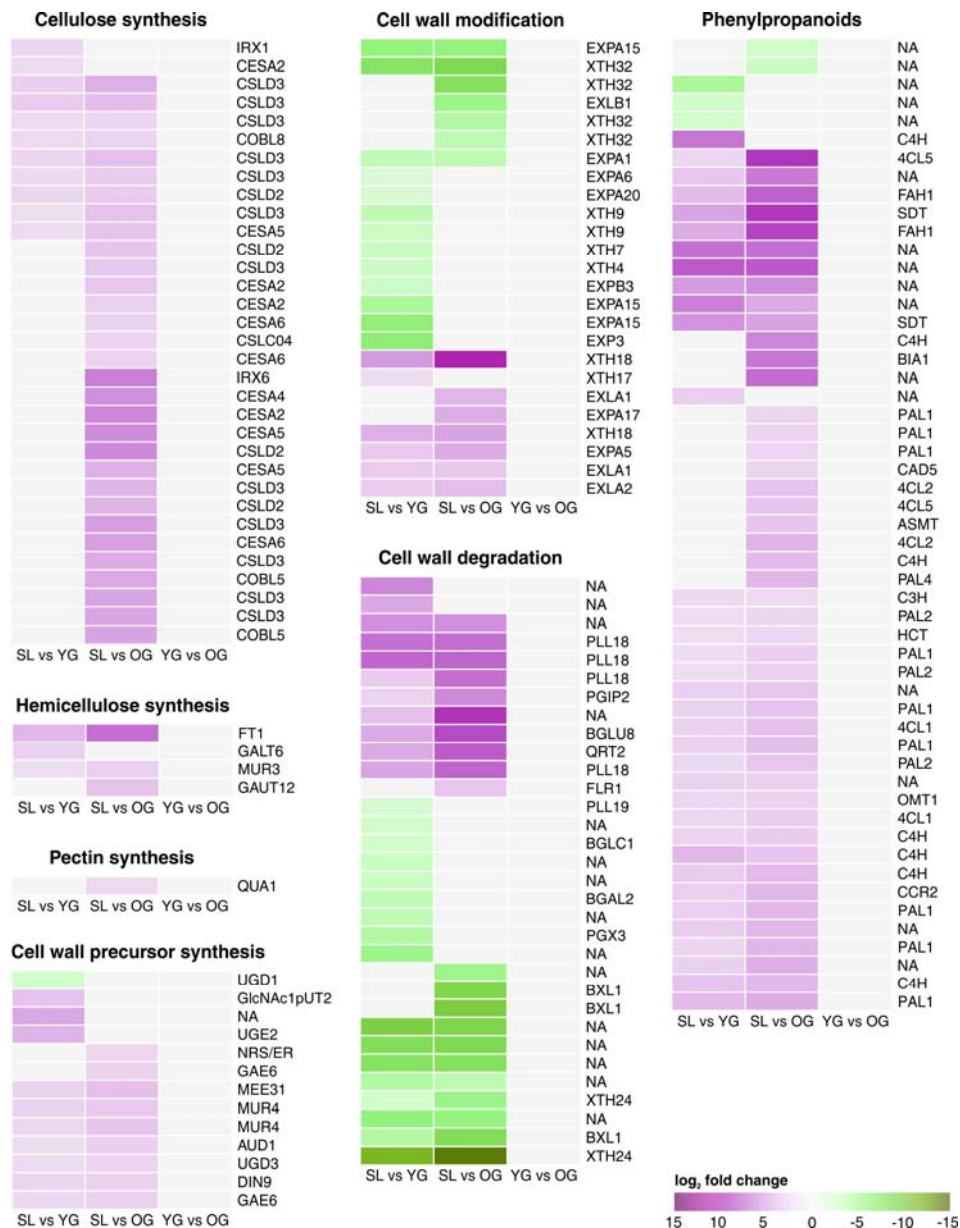

270  
 271 **Figure 3: Kohlrabi cell wall metabolism.** Clustered heatmaps of log<sub>2</sub> fold change values of DEGs.  
 272 Genes involved in anabolic processes of cell wall components were generally up-regulated in SL  
 273 compared with YG and OG, whereas catabolic and modifying genes were mainly down-regulated. No  
 274 DEGs were present comparing YG with OG. Up-regulated genes are shaded in purple and down-  
 275 regulated genes in green. *Arabidopsis* homologs are given. NA: not assigned.  
 276  
 277

278

279 **Plant hormones**

280 The CK and auxin metabolism was altered in YG and OG compared with SL (Fig. 4). So was  
 281 a homolog of CKX6 (cytokinin oxidase/dehydrogenase 6) down-regulated in SL compared  
 282 with YG. Homologs of CKX5, CK receptors, and a CK-regulated UDP-glucosyltransferase  
 283 were up-regulated in SL. Most auxin related DEGs, auxin response factors (ARFs and IAAs)  
 284 and IAA amino acid conjugate synthetases (GH3) were up-regulated in SL compared with  
 285 gall tissue (Additional file 1: Figure S4). However, an IAA7 gene, a repressor of auxin  
 286 inducible genes was down-regulated, as well as a homolog of GH3.2. Expression of PIN-  
 287 FORMED 1 (PIN1) genes was reduced in SL (Fig. 4). Whereas SAUR (small auxin up-  
 288 regulated RNA) and AIR12 (auxin-induced in root cultures protein 12-like) genes, were  
 289 found in up- and down-regulated DEGs (Fig. 4). Myrosinases and nitrilases were up-regulated  
 290 in SL compared with galls (Additional file 1: Figure S5). Compared with the control CK and  
 291 auxin metabolism were up-regulated in SL (Additional file 1: Figure S3). In old galls two  
 292 transcripts related to auxin synthesis and regulation were down-regulated compared with  
 293 young galls (Additional file 2: Table S4).  
 294

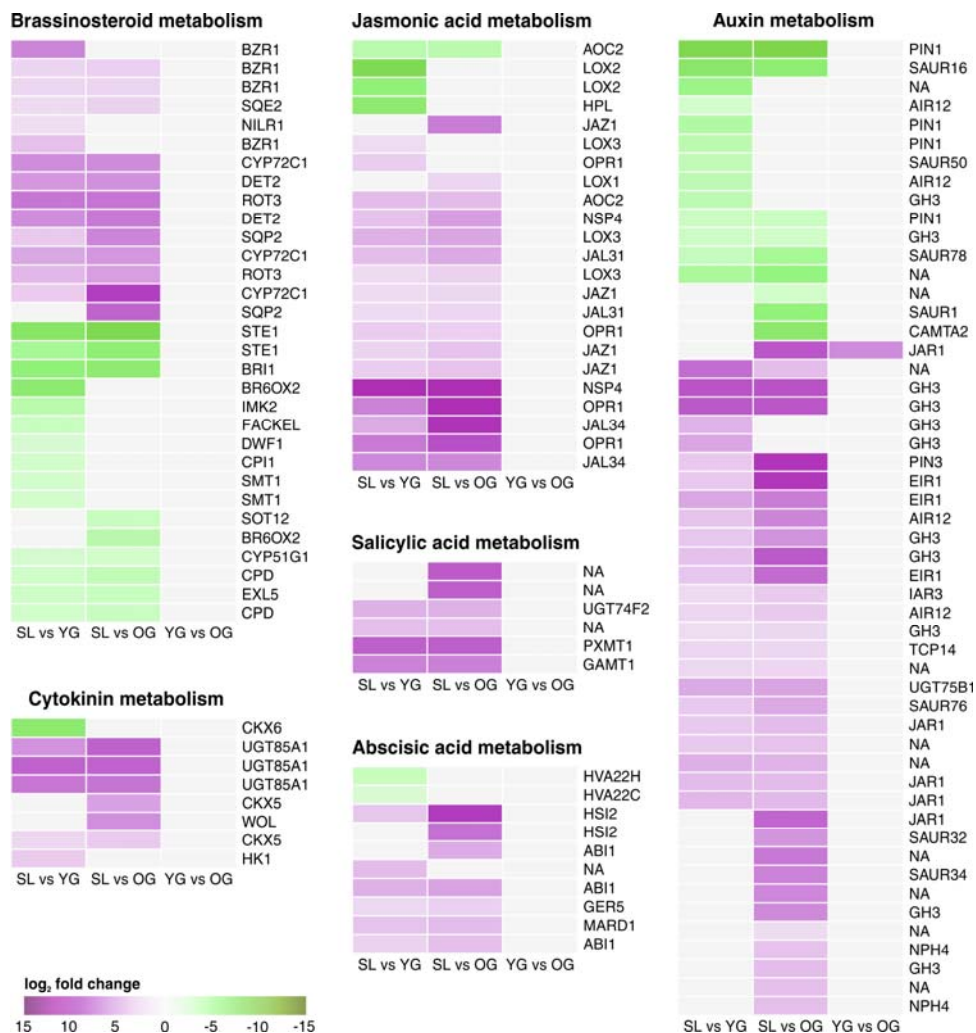

295

296 **Figure 4: Kohlrabi phytohormone metabolism.** Heatmaps of log<sub>2</sub> fold change values of DEGs.  
 297 Genes involved in cytokinin, jasmonic acid, salicylic acid, and abscisic acid metabolism were up-  
 298 regulated in SL. Genes coding for brassinosteroids clustered into two groups: later stages in BR  
 299 biosynthesis (down-regulated) and early sterol biosynthesis (up-regulated). Genes involved in auxin  
 300 metabolism were found within the up- and down-regulated DEGs in SL compared with root galls. One



301 DEGs (JAR1) was found between YG and OG. Up-regulated genes are shaded in purple and down-  
 302 regulated genes in green. *Arabidopsis* homologs are given. NA: not assigned.

303 Early sterol biosynthesis genes, such as the steroid reductase DET2, were up-regulated in  
 304 SL compared with galls (Fig. 4). Compared with the control, DET2 was up-regulated in SL  
 305 (Additional file 1: Figure S3). However, BR biosynthesis genes were generally down-  
 306 regulated in SL (Fig. 4), including key genes like DWF1 (dwarf 1) or BRI1 (BR receptor  
 307 brassinosteroid insensitive 1).

308 Abscisic acid (ABA) signal transduction related genes like ABI1 (ABA insensitive 1) and  
 309 HSI2 (high-level expression of sugar-inducible gene 2) were up-regulated in SL compared  
 310 with YG and OG (Fig. 4) whereas ABA related transcription factors WRKY18 and  
 311 HVA22A/C homologs were down-regulated in SL (Fig. 4, Additional file 1: Figure S6).

### 312 Plant defence

313 Generally, genes for disease resistance proteins were up-regulated in SL compared with YG  
 314 and OG (Fig. 5). From pathogen recognition genes via signalling proteins and transcription  
 315 factors to pathogenesis related (PR) proteins, the whole signal cascade of pathogen defence  
 316 was affected. Of the predicted defence related DEGs within infected plants (SL vs YG vs OG)  
 317 60 were assigned as TIR-NBS-LRR (Toll/interleukin-1 receptor nucleotide-binding site  
 318 leucine-rich repeat) class proteins.

319 The BIK1 (botrytis-induced kinase 1), which interacts with BRI1 and BAK1 (BRI1-  
 320 associated receptor kinase) to induce defence responses was up-regulated in SL compared  
 321 with galls (Additional file 1: Figure S7) and up-regulated in SL compared with C (Additional  
 322 file 1: Figure S3).

323  
 324  
 325

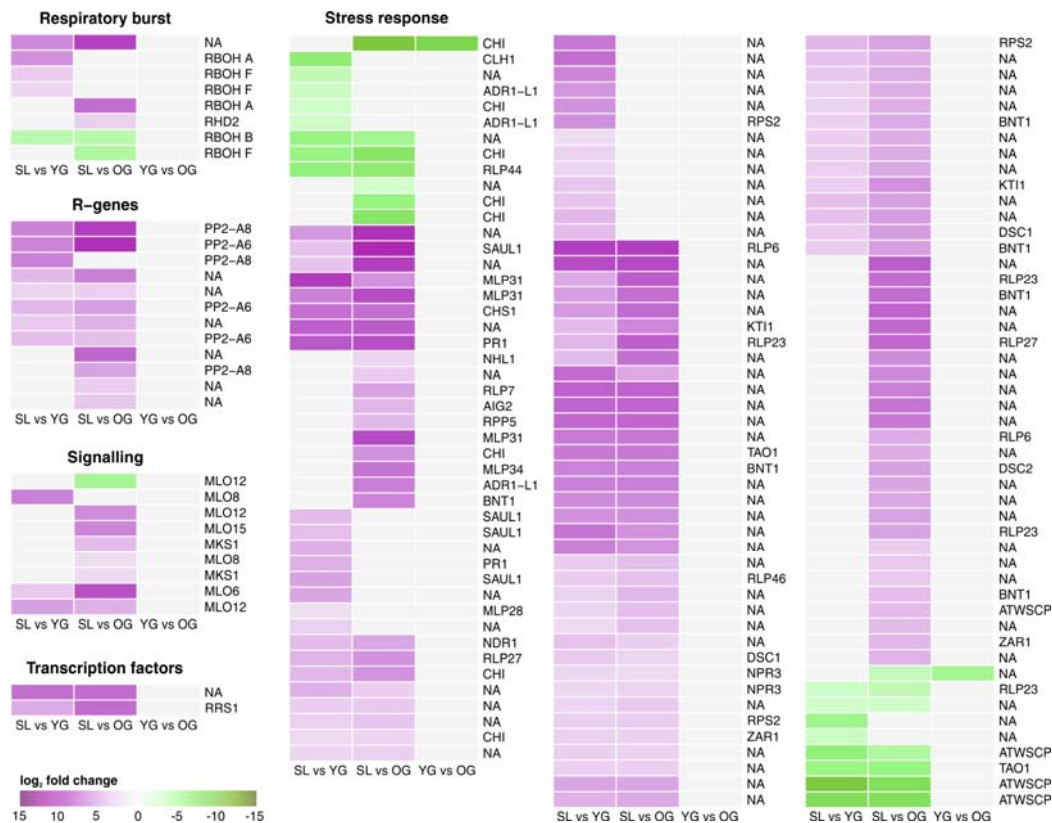

326  
 327  
 328  
 329  
 330

**Figure 5: Biotic stress response of kohlrabi.** Heatmaps of  $\log_2$  fold change values of DEGs. Almost all DEGs were up-regulated in SL compared with root galls. Two down-regulated DEGs, a chitinase (CHI) and a gene of unknown function, were found between YG and OG. Up-regulated genes are

331 shaded in purple and down-regulated genes in green. *Arabidopsis* homologs are given. NA: not  
332 assigned.

333

334 In SL JA related genes such as LOX2 (lipoxygenase 2), AOC (allene oxide cyclase), and  
335 HPL (hydroperoxide lyase) were down-regulated, while other LOX genes and the JA amido  
336 synthetase genes JAR1 were up-regulated in SL compared with galls (Fig. 4). One down-  
337 regulated isoform of JAR1 was found between OG and YG. We found no glucosinolate  
338 biosynthesis genes in the DEGs in our study.

339 The ICS1 gene and the ICS1 activating transcription factor WRKY28 (van Verk *et al.*,  
340 2011) were up-regulated in SL compared with the control plant (data not shown). Genes for  
341 SA modification, like the SA methylating SABATH methyl transferase genes (PXMT1,  
342 GAMT1) and a SA-glucosidase (UGT74F2) were up-regulated in SL compared with galls  
343 (Fig. 4). The SA induced PR1 gene was induced in SL (Fig. 5). The PR-gene expression  
344 regulator NPR1 (non-expressor of PR1) was not differentially expressed in our samples. Of  
345 genes that regulate PR1 expression via NPR1, WRKY70 was down-regulated in SL whereas  
346 NPR3 and TGA3 were up-regulated (Fig. 5, Additional file 1: Figure S6). Compared with the  
347 uninfected plant, the TGA3 gene expressions appeared to be induced in SL. Genes for the  
348 TAO1 disease resistant protein, which induces PR1 expression were up-regulated in SL, as  
349 well as the NDR1 (non-race specific disease resistance 1) gene, required for the establishment  
350 of hypersensitive response and SAR. Genes for the disease resistant protein RPS2, activated  
351 by NDR1, were also up-regulated in SL (Fig. 5). Additionally, other defence related genes  
352 coding for protease inhibitor genes, R-genes or some chitinases were down-regulated in SL  
353 (Fig. 5). Comparing biotic stress response genes of SL with the control (C), we observed an  
354 up-regulation of 164 of the total 190 DEGs (Additional file 1: Figure S3).

355

#### 356 ***P. brassicae* gene expression**

357 The *P. brassicae* genes with the highest FPKM values belonged to growth and cellular  
358 process related COG categories such as translation, transcription, and signal transduction, but  
359 also in energy conversion and carbohydrate and lipid metabolism (Additional file 1:  
360 Figure S8). The *P. brassicae* PbBSMT gene was amongst the highest expressed pathogen  
361 genes (Additional file 2: Tables S7, S8). Other highly expressed genes were HSPs (heat shock  
362 proteins), a glutathione-S-transferase, an ankyrin repeat domain-containing protein, ribosomal  
363 genes, and genes of unknown function (Additional file 2: Tables S7, S8). The PbGH3 gene  
364 was not expressed in our samples. The *P. brassicae* protease gene PRO1, proposed to be  
365 involved in spore germination (Feng *et al.*, 2010), was expressed in both YG and OG.

366 Between YG and OG samples only five *P. brassicae* DEGs were identified, coding for a  
367 HSP, a chromosomal maintenance protein, a DNA-directed RNA-polymerase, a  
368 retrotransposon and a Scl Tal1 interrupting locus protein (Additional file 2: Table S9).

369 Cumulating all FPKM values revealed that most sequenced reads from *P. brassicae* RNA  
370 extracted from root galls (YG and OG) mapped to the COG categories “Post-translational  
371 modification, protein turnover, chaperon functions” and “Translation” (Additional file 1:  
372 Figure S9). Very few *P. brassicae* reads were found in the data obtained from the control  
373 plant and SL (Additional file 1: Figure S10), those were most likely from attached spores or  
374 contamination via soil particles.

375

376

377 **Discussion**

378 **Symptomless roots of clubroot infected plants show transcriptomic traits of clubroot**  
379 **resistant/tolerant plants.**

380

381 We found that symptomless roots and clubroots originating from the same plant show  
382 differences in their transcriptomic profile similar to the differences of whole roots between  
383 resistant and susceptible plants. Gene expression patterns of symptomless roots were similar  
384 to the patterns described for resistant hosts, while in clubroot tissue patterns were similar to  
385 those observed in susceptible plants. Symptomless roots did also show an induction of several  
386 defence related processes (Figs. 3-5) compared with the uninfected control plant. Genes  
387 involved in cell wall stability were up-regulated in SL (Fig. 3).

388 Reinforcement of cell walls has previously been reported to hamper the development of  
389 *P. brassicae* in resistant *B. oleracea* (Donald et al., 2008) and *B. rapa* callus cultures  
390 (Takahashi et al., 2001). Lignin biosynthesis genes were up-regulated in SL tissue compared  
391 with root gall tissue and the control plant (Fig. 3, Additional file 1: Figure S2). Induced  
392 lignification processes were observed in shoots of infected plants (Irani et al., 2018) and  
393 between resistant and susceptible *B. oleracea* cultivars (Zhang et al., 2016). PAL1, a key  
394 enzyme in lignin, SA (discussed below) and flavonoid biosynthesis (Chu *et al.*, 2014, Song *et*  
395 *al.*, 2016, Lahlali *et al.*, 2017) was up-regulated in symptomless roots compared with clubroot  
396 tissue and the control plant (Fig. 3). Increased lignin biosynthesis and up-regulation of PAL1  
397 has been described for an clubroot resistant oilseed rape line carrying the resistance gene Rcr1  
398 (Lahlali et al., 2017), while callus cultures overexpressing PAL1 were resistant to an infection  
399 with *P. brassicae* (Takahashi et al., 2001).

400 Root reinforcement, therefore, seems to be part of the tolerance mechanism of plants  
401 against *P. brassicae*. *P. brassicae* has only a limited arsenal of plant cell wall degrading  
402 enzymes in its genome (Schwelm et al., 2015, Rolfe et al., 2016) and infects its hosts via  
403 mechanical force with a specialised extrusosome called “Stachel and Rohr” (Kageyama &  
404 Asano, 2009). Increased stability of the cell wall, as indicated by gene expression patterns in  
405 symptomless roots (Fig. 3) or described for resistant plants (Donald et al., 2008, Takahashi  
406 et al., 2001), requires higher mechanical force for successful infection of the host plant,  
407 providing a considerable obstacle for *P. brassicae*.

408 In symptomless roots of infected plants, defence related pathways regulated by hormones  
409 show patterns usually linked to induced plant defence (Fig. 4). Clubroot tissue on the other  
410 hand showed suppression of SA-defence related processes. Genes of SA biosynthesis were  
411 up-regulated in SL, but were down-regulated in galls. Salicylic acid can be synthesised via  
412 isochorismate (ICS pathway) or from phenylalanine (via PAL pathway) (Pieterse et al., 2012,  
413 Lovelock et al., 2016). The up-regulation of the PAL1 gene in symptomless roots could also  
414 be linked to the PAL-dependent synthesis of SA, but the majority of SA in clubroot is  
415 produced via the ICS pathway (Lovelock et al., 2016). Based on the higher expression of  
416 ICS1 and WRKY28 in SL compared with the control, the synthesis of SA was likely induced  
417 in SL. In clubroot resistant hosts SA-defence is usually induced (Jubault et al., 2013, Chen et  
418 al., 2016a, Lovelock et al., 2016), whereas the SA deficient *sid2* (ICS1) mutant of  
419 *Arabidopsis* was more susceptible to *P. brassicae* infection (Chen et al., 2016b).

420 High SA levels in plant tissues helped to reduce new *P. brassicae* infections (Lovelock et  
421 al., 2013), but SA alone is not sufficient to induce resistance against *P. brassicae* (Lovelock  
422 et al., 2016). Because SA levels increase in clubroot tissue *P. brassicae* is thought to secrete a  
423 SABATH-type methyltransferase (PbBSMT; Ludwig-Müller et al., 2015, Bulman et al.,  
424 2018), which was one of the highest expressed genes of *P. brassicae* in this study (Additional  
425 file 2: Tables S7, S8). PbBSMT has been shown to methylate salicylic acid, contributing to a  
426 local reduction of SA in the galls (Ludwig-Müller et al., 2015). MeSA is the major transport  
427 form of SA in the plant and has a key role in inducing SAR (Vlot *et al.*, 2009, Park *et al.*,  
428 2007). So based on our data we hypothesise that *P. brassicae* reduces SA concentrations in the  
429 galls via PbBSMT mediated methylation (Ludwig-Müller et al., 2015). The so produced

430 MeSA could trigger SA-related defences in distant plant parts, which become resilient  
431 towards new pathogen infection.

432 Processes downstream from SA are mediated via NPR1 (not differentially expressed in our  
433 dataset). NPR1 induces PR-gene expression when bound to TGA3 (Saleh *et al.*, 2015). In its  
434 interaction with WRKY70, NPR1 serves as a negative regulator of the SA biosynthesis gene  
435 ICS1 (Wang *et al.*, 2006). Thus the observed up-regulation of TGA3 in SL (Additional file 1:  
436 Figure S6) would lead to an induction of expression of PR-genes in SL. The reduced  
437 expression of WRKY70 in SL compared with the galls would lead to a higher SA production  
438 in the uninfected root tissue. Additionally, we found an up-regulation of NPR3 genes, coding  
439 for repressors of SA-defence genes (Ding *et al.*, 2018), in SL compared with the galls  
440 (Fig. 5). When bound to SA, NPR3 would lose its function of repressing SA-defence genes  
441 (Ding *et al.*, 2018). The higher expression of NPR3 in the SL might be necessary to  
442 compensate for negative effects of the SA synthesis in SL roots.

443 Against some strains of *P. brassicae*, JA contributed to a basal resistance in *A. thaliana*  
444 Col-0 and mutants impaired in JA-Ile accumulation, showed a higher susceptibility to  
445 *P. brassicae* (Agarwal *et al.*, 2011, Gravot *et al.*, 2012). In *A. thaliana* Col-0 several JA-  
446 responsive genes were induced in infected root tissues and JA accumulates in galls (Siemens  
447 *et al.*, 2006, Gravot *et al.*, 2012). But in partially resistant *Arabidopsis* Bur-0 only weak JA  
448 responses compared with the susceptible Col-0 were found (Lemarié *et al.*, 2015). Those  
449 differences might be due to if aliphatic or aromatic glucosinolate production is induced by JA  
450 in the particular host (Xu *et al.*, 2018). Generally clubroot susceptible hosts show a high level  
451 of JA response, whereas it is reduced in resistant hosts (Jubault *et al.*, 2008, Chen *et al.*,  
452 2016a). In our samples, JAZ genes were up-regulated in SL compared with the gall tissue  
453 (Fig. 4) and the control plant. JAZ proteins act as JA co-receptors and transcriptional  
454 repressors in JA signalling (Kazan & Manners, 2012) reducing the JA synthesis in SL. This  
455 was previously observed in *B. oleracea* plants, where JAZ expression was up-regulated in  
456 resistant plants and JA synthesis was highly induced in susceptible plants (Zhang *et al.*,  
457 2016). Among JA-metabolism genes HPL, and LOX2 expression were up-regulated in the  
458 galls. LOX2 is essential for the formation of oxylipin volatiles (Mochizuki *et al.*, 2016). The  
459 HPL protein competes with substrates essential for JA-synthesis, producing volatile and non-  
460 volatile oxylipins (Wasternack & Hause, 2013). The higher expression of HPL and LOX2 in  
461 the galls might lead to the production of volatile aldehydes rather than a JA accumulation in  
462 the galls.

463 In SL BR-synthesis and BR-signalling genes were down-regulated (Fig. 4). BRs are  
464 necessary for the development of clubroot tissue (Schuller *et al.*, 2014), hence a reduction in  
465 BRs impairs *P. brassicae* growth and development in SL. The receptor-like cytoplasmic  
466 kinase BIK1, a negative regulator of BR-synthesis (Lin *et al.*, 2013), was induced in SL  
467 (Additional file 1: Figure S7). *Arabidopsis bik1* knockout mutants have an increased tolerance  
468 to *P. brassicae* lacking the typical pathogen phenotype (Chen *et al.*, 2016a, Chen *et al.*,  
469 2016b). For BIK1 the expression of the SL roots differed to resistant plants, as *Arabidopsis*  
470 *bik1* knockout mutants have an increased tolerance to *P. brassicae* (Chen *et al.*, 2016a, Chen  
471 *et al.*, 2016b). In *Arabidopsis bik1* clubroot resistance was likely not due to the regulatory  
472 function of BIK1 for BR, but to increased PR1 expression in this mutant (Chen *et al.*, 2016b).

#### 474 **Transcriptomes of symptomless roots and clubroots of the same plant are markedly** 475 **different.**

476 Clubroots and symptomless roots of the same *P. brassicae* infected plants showed markedly  
477 different gene expression patterns. The morphological changes of the clubroots go in hand  
478 with expression of genes that reduce cell wall stability and growth related processes. Genes  
479 for cell wall-loosening processes such as expansins and XTHs (Downes *et al.*, 2001, Sun *et al.*  
480 *et al.*, 2005), were up-regulated in gall tissue (Fig. 3). Up-regulation of expansins was reported  
481 from *Arabidopsis* clubroot tissue (Siemens *et al.*, 2006, Irani *et al.*, 2018) while XTH activity  
482 was reported in *B. rapa* clubroots (Devos *et al.*, 2005). Suppression of xyloglucan, xylan,  
483 hemicellulose, pectin and lignin synthesis in gall tissues implies additional reduction of the  
484 cell wall stability and rigidity in gall tissues similar to previous findings (Schuller *et al.*, 2014,



485 Zhang et al., 2016). GAE6 expression was reduced in the galls supporting clubroot  
486 development: *Arabidopsis gae1*, *gae6*, and *gae1/gae6* mutants contained lower levels of  
487 pectin in their leaf cell walls making them more susceptible to *Pseudomonas syringae* and  
488 *Botrytis cinerea* (Bethke et al., 2016). A similar mechanism might benefit *P. brassicae*.  
489 Induction of the lignin pathway was an early response (48h) in *Arabidopsis* (Zhao et al.,  
490 2017). In our much older kohlrabi galls lignification genes were down-regulated suggesting  
491 *P. brassicae* suppresses host lignification in tissues where it has itself established. In *B. napus*  
492 reduced lignification was also implied by the down-regulation of CCoAOMT (caffeoyl-CoA  
493 O-methyltransferase) (Cao et al., 2008). Here, although not statistically significant,  
494 CCoAOMT was also lower expressed in root galls compared with SL, supporting a decreased  
495 lignin biosynthesis in clubroots.

496 The marked hypertrophies of the plant roots go hand in hand with changes in the  
497 homeostasis of the growth hormones CK and auxins which appear to be host and time  
498 dependent (Ludwig-Müller et al., 2009, Jia et al., 2017). With the exception of CKX6,  
499 cytokinin related genes are up-regulated in SL (Fig. 4). Fine tuning of the hormone balance  
500 appears to be essential in clubroot disease development (Ludwig-Müller et al., 2009).  
501 Elevated CK levels are important for the onset of disease development via increasing cell  
502 divisions. However, at the onset of gall formation CK metabolism genes, including CK  
503 synthesizing and degrading enzymes, are repressed (Siemens et al., 2006, Malinowski et al.,  
504 2016). The more active CK metabolism in the SL, might interfere with clubroot development  
505 as CKX overexpressing *Arabidopsis* mutant showed reduced gall formation (Siemens et al.,  
506 2006). In our kohlrabi samples CKX6 was strongly down-regulated in SL compared with YG  
507 but not compared with OG (Fig. 4). The high expression of CKX6 in the YG indicates the  
508 presence of plasmodia, as the gene was found to be strongly up-regulated only in cells  
509 containing *P. brassicae* plasmodia (Schuller et al., 2014). Evidence that *P. brassicae*  
510 interferes with the CK balance via the PbCKX of *P. brassicae* in gall tissues has not been  
511 seen in this study as the PbCKX gene was not expressed.

512 Myrosinases and nitrilases that can synthesize auxins from secondary metabolites or  
513 aromatic amino acids were up-regulated in SL compared with galls (Additional file 1:  
514 Figures S5), but were previously described to be induced in *Arabidopsis* galls (Grsic-Rausch  
515 et al., 2000, Siemens et al., 2006). The auxin-induced GH3 gene family, which conjugates  
516 IAA to several amino acids, is involved in various responses of plants to abiotic and biotic  
517 stresses. The GH3.2 gene was shown to be specifically expressed in clubroots of *Arabidopsis*  
518 (Jahn et al., 2013), and was also up-regulated in the kohlrabi galls. Expression of the  
519 *P. brassicae* PbGH3 gene was not detected in this study and appears not to play a role in the  
520 auxin (or JA) homeostasis at the stage of our gall samples.

521 Besides the described defence responses in SL that are similar to defence responses of  
522 resistance plants, we observed up-regulation of other defence related genes in the SL (Fig. 5).  
523 Homologues of the Arabidopsis Toll-IL-1 receptor (TIR)-NB-LRR disease resistance proteins  
524 TAO1, NDR1 and RPS2 genes were up-regulated in SL. Those genes confer resistance to  
525 biotrophic bacterial pathogens in *Arabidopsis* when recognizing effectors (Coppinger et al.,  
526 2004, Eitas et al., 2008). In roots of beans NDR1 also suppressed nematode parasitism by  
527 activating defence responses (McNeece et al., 2017). Thus, we found indications that those  
528 proteins might also be involved in a defence response towards *P. brassicae* in the roots.

529 As a result of gall formation and a reduced number of fine roots, clubroot infected plants  
530 face abiotic stress like lower water and nutrient supply. The differential expression of ABA  
531 related genes (Fig. 4) are therefore likely a response to the abiotic stress in the galls.

532  
533

## 534 Conclusions

535 Clubroots and symptomless roots of the same, *P. brassicae* infected plants showed very  
536 different gene expression pattern. The here described differences in the plant hormone  
537 metabolism might be responsible for the different outcomes in gall tissue and in  
538 symptomless roots as is the increased cell wall stability in symptomless roots. These results

539 highlight, that interpreting clubroot transcriptomes or any other data originating from whole  
540 root systems might result in a dilution of biologically relevant signatures. This clearly calls  
541 for further studies analysing intra- and inter-tissue specific pattern of clubroot infected plants.  
542 As genes involved in resistance responses to *P. brassicae* in were up-regulated in  
543 symptomless roots, this might aid the identification of novel traits for resistance breeding.  
544  
545

#### 546 **Acknowledgements**

547 We thank Srilakshmy Harikrishnan for discussion of bioinformatic analyses. M. H. Borham  
548 (Agriculture and Agri-Food Canada, 107 Science Place, Saskatoon, SK S7N0X2, Canada)  
549 provided the PT3 data. Illumina sequencing was performed at the VBCF NGS Unit  
550 (www.vbcf.ac.at).  
551

#### 552 **Funding**

553 S.C and S.N. were funded by the Austrian Science Fund (grant Y0810-B16) and A.S. by  
554 Formas, the Swedish Research Council (grant 2015-1317).  
555

#### 556 **Availability of data and materials**

557 The datasets generated and analysed during the current study are available in the European  
558 Nucleotide Archive (ENA; <https://www.ebi.ac.uk/ena>) repository under the project  
559 PRJEB26435 (Accessions ERR2567399-ERR2567408) and are available from the  
560 corresponding author on request.  
561

#### 562 **Authors' contributions**

563 Experimental concept and design: SN. Wet lab work: SC. Bioinformatic and statistic analysis:  
564 SC. Analysis of Results: SC, AS, SN. Manuscript writing: SC, AS, SN. Figures and tables:  
565 SC. All authors read and approved the final manuscript.  
566

#### 567 **Ethics approval and consent to participate**

568 Not applicable.  
569

#### 570 **Consent for publication**

571 Not applicable.  
572

#### 573 **Competing interests**

574 The authors declare that they have no competing interests.  
575

#### 576 **Additional files**

577 Additional file 1: Figure S1 - Figure S10

578 Additional file 2: Table S1 - Table S9

579

580

581 **References**

- 582 Agarwal, A., Kaul, V., Faggian, R., Rookes, J. E., Ludwig-Muller, J. and Cahill, D. M. (2011)  
583 Analysis of global host gene expression during the primary phase of the Arabidopsis  
584 thaliana-Plasmodiophora brassicae interaction. *Functional Plant Biology*, **38**, 462-  
585 478.
- 586 Altschul, S. F., Gish, W., Miller, W., Myers, E. W. and Lipman, D. J. (1990) Basic Local  
587 Alignment Search Tool. *J Mol Biol*, **215**, 403-410.
- 588 Andrews, S. (2010) FastQC: a quality control tool for high throughput sequence data.
- 589 Bethke, G., Thao, A., Xiong, G., Li, B., Soltis, N. E., Hatsugai, N., *et al.* (2016) Pectin  
590 Biosynthesis Is Critical for Cell Wall Integrity and Immunity in Arabidopsis thaliana.  
591 *Plant Cell*, **28**, 537-556.
- 592 Bi, K., He, Z. C., Gao, Z. X., Zhao, Y., Fu, Y. P., Cheng, J. S., *et al.* (2016) Integrated omics  
593 study of lipid droplets from Plasmodiophora brassicae. *Scientific reports*, **6**.
- 594 Bolger, A. M., Lohse, M. and Usadel, B. (2014) Trimmomatic: a flexible trimmer for  
595 Illumina sequence data. *Bioinformatics*, **30**, 2114-2120.
- 596 Bulman, S. and Braselton, J. P. (2014) Rhizaria: Phytomyxea. In: *The Mycota VII, Part A,*  
597 *Systematics and Evolution* (McLaughlin, D. J. and Spatafora, J. W., eds.). Springer  
598 Berlin Heidelberg, pp. 99-112.
- 599 Bulman, S., Richter, F., Marschollek, S., Benade, F., Jülke, S. and Ludwig-Müller, J. (2018)  
600 Arabidopsis thaliana expressing PbBSMT, a gene encoding a SABATH-type  
601 methyltransferase from the plant pathogenic protist Plasmodiophora brassicae, show  
602 leaf chlorosis and altered host susceptibility. *Plant Biology*.
- 603 Cao, T., Srivastava, S., Rahman, M. H., Kav, N. N. V., Hotte, N., Deyholos, M. K., *et al.*  
604 (2008) Proteome-level changes in the roots of Brassica napus as a result of  
605 Plasmodiophora brassicae infection. *Plant Science*, **174**, 97-115.
- 606 Chalhoub, B., Denoeud, F., Liu, S., Parkin, I. A., Tang, H., Wang, X., *et al.* (2014) Plant  
607 genetics. Early allopolyploid evolution in the post-Neolithic Brassica napus oilseed  
608 genome. *Science*, **345**, 950-953.
- 609 Chen, J., Pang, W., Chen, B., Zhang, C. and Piao, Z. (2016a) Transcriptome Analysis of  
610 Brassica rapa Near-Isogenic Lines Carrying Clubroot-Resistant and -Susceptible  
611 Alleles in Response to Plasmodiophora brassicae during Early Infection. *Front Plant*  
612 *Sci*, **6**, 1183.
- 613 Chen, T., Bi, K., He, Z. C., Gao, Z. X., Zhao, Y., Fu, Y. P., *et al.* (2016b) Arabidopsis Mutant  
614 bik1 Exhibits Strong Resistance to Plasmodiophora brassicae. *Front Physiol*, **7**.
- 615 Cheng, F., Sun, R., Hou, X., Zheng, H., Zhang, F., Zhang, Y., *et al.* (2016) Subgenome  
616 parallel selection is associated with morphotype diversification and convergent crop  
617 domestication in Brassica rapa and Brassica oleracea. *Nat Genet*, **48**, 1218-1224.
- 618 Chu, M. G., Song, T., Falk, K. C., Zhang, X. G., Liu, X. J., Chang, A., *et al.* (2014) Fine  
619 mapping of Rcr1 and analyses of its effect on transcriptome patterns during infection  
620 by Plasmodiophora brassicae. *Bmc Genomics*, **15**.
- 621 Coppinger, P., Repetti, P. P., Day, B., Dahlbeck, D., Mehlert, A. and Staskawicz, B. J. (2004)  
622 Overexpression of the plasma membrane-localized NDR1 protein results in enhanced  
623 bacterial disease resistance in Arabidopsis thaliana. *Plant J*, **40**, 225-237.
- 624 Cosgrove, D. J. (2005) Growth of the plant cell wall. *Nat Rev Mol Cell Bio*, **6**, 850-861.
- 625 Daval, S., Belcour, A., Gazengel, K., Legrand, L., Gouzy, J., Cottret, L., *et al.* (2018).
- 626 Deora, A., Gossen, B. D. and McDonald, M. R. (2013) Cytology of infection, development  
627 and expression of resistance to Plasmodiophora brassicae in canola. *Ann Appl Biol*,  
628 **163**, 56-71.
- 629 Devos, S., Laukens, K., Deckers, P., Van Der Straeten, D., Beeckman, T., Inze, D., *et al.*  
630 (2006) A hormone and proteome approach to picturing the initial metabolic events  
631 during Plasmodiophora brassicae infection on Arabidopsis. *Mol Plant Microbe*  
632 *Interact*, **19**, 1431-1443.

- 633 Devos, S., Vissenberg, K., Verbelen, J. P. and Prinsen, E. (2005) Infection of Chinese  
634 cabbage by *Plasmodiophora brassicae* leads to a stimulation of plant growth: impacts  
635 on cell wall metabolism and hormone balance. *New Phytol*, **166**, 241-250.
- 636 Ding, Y., Sun, T., Ao, K., Peng, Y., Zhang, Y., Li, X., *et al.* (2018) Opposite Roles of  
637 Salicylic Acid Receptors NPR1 and NPR3/NPR4 in Transcriptional Regulation of  
638 Plant Immunity. *Cell*, **173**, 1454-1467 e1415.
- 639 Dixon, G. R. (2009) The Occurrence and Economic Impact of *Plasmodiophora brassicae* and  
640 Clubroot Disease. *J Plant Growth Regul*, **28**, 194-202.
- 641 Donald, E. C., Jaudzems, G. and Porter, I. J. (2008) Pathology of cortical invasion by  
642 *Plasmodiophora brassicae* in clubroot resistant and susceptible *Brassica oleracea*  
643 hosts. *Plant Pathology*, **57**, 201-209.
- 644 Downes, B. P., Steinbaker, C. R. and Crowell, D. N. (2001) Expression and Processing of a  
645 Hormonally Regulated  $\beta$ -Expansin from Soybean. *Plant Physiology*, **126**, 244-252.
- 646 Eitas, T. K., Nimchuk, Z. L. and Dangl, J. L. (2008) Arabidopsis TAO1 is a TIR-NB-LRR  
647 protein that contributes to disease resistance induced by the *Pseudomonas syringae*  
648 effector AvrB. *Proc Natl Acad Sci U S A*, **105**, 6475-6480.
- 649 Feng, J., Hwang, R., Hwang, S. F., Strelkov, S. E., Gossen, B. D., Zhou, Q. X., *et al.* (2010)  
650 Molecular characterization of a serine protease Pro1 from *Plasmodiophora brassicae*  
651 that stimulates resting spore germination. *Mol Plant Pathol*, **11**, 503-512.
- 652 Fu, Z. Q. and Dong, X. (2013) Systemic acquired resistance: turning local infection into  
653 global defense. *Annu Rev Plant Biol*, **64**, 839-863.
- 654 Grabherr, M. G., Haas, B. J., Yassour, M., Levin, J. Z., Thompson, D. A., Amit, I., *et al.*  
655 (2011) Full-length transcriptome assembly from RNA-Seq data without a reference  
656 genome. *Nat Biotechnol*, **29**, 644-652.
- 657 Gravot, A., Deleu, C., Wagner, G., Lariagon, C., Lugan, R., Todd, C., *et al.* (2012) Arginase  
658 induction represses gall development during clubroot infection in Arabidopsis. *Plant*  
659 *Cell Physiol*, **53**, 901-911.
- 660 Grsic-Rausch, S., Kobelt, P., Siemens, J. M., Bischoff, M. and Ludwig-Muller, J. (2000)  
661 Expression and localization of nitrilase during symptom development of the clubroot  
662 disease in Arabidopsis. *Plant Physiol*, **122**, 369-378.
- 663 Haas, B. J. and Papanicolaou, A. (2017) TransDecoder (Find Coding Regions Within  
664 Transcripts).
- 665 Harholt, J., Suttangkakul, A. and Vibe Scheller, H. (2010) Biosynthesis of pectin. *Plant*  
666 *Physiol*, **153**, 384-395.
- 667 Huerta-Cepas, J., Szklarczyk, D., Forslund, K., Cook, H., Heller, D., Walter, M. C., *et al.*  
668 (2016) eggNOG 4.5: a hierarchical orthology framework with improved functional  
669 annotations for eukaryotic, prokaryotic and viral sequences. *Nucleic Acids Res*, **44**,  
670 D286-293.
- 671 Irani, S., Trost, B., Waldner, M., Nayidu, N., Tu, J., Kusalik, A. J., *et al.* (2018)  
672 Transcriptome analysis of response to *Plasmodiophora brassicae* infection in the  
673 Arabidopsis shoot and root. *BMC Genomics*, **19**, 23.
- 674 Jahn, L., Mucha, S., Bergmann, S., Horn, C., Staswick, P., Steffens, B., *et al.* (2013) The  
675 Clubroot Pathogen (*Plasmodiophora brassicae*) Influences Auxin Signaling to  
676 Regulate Auxin Homeostasis in Arabidopsis. *Plants*, **2**, 726-749.
- 677 Jia, H., Wei, X., Yang, Y., Yuan, Y., Wei, F., Zhao, Y., *et al.* (2017) Root RNA-seq analysis  
678 reveals a distinct transcriptome landscape between clubroot-susceptible and clubroot-  
679 resistant Chinese cabbage lines after *Plasmodiophora brassicae* infection. *Plant and*  
680 *Soil*, **421**, 93-105.
- 681 Jubault, M., Hamon, C., Gravot, A., Lariagon, C., Delourme, R., Bouchereau, A., *et al.*  
682 (2008) Differential Regulation of Root Arginine Catabolism and Polyamine  
683 Metabolism in Clubroot-Susceptible and Partially Resistant Arabidopsis Genotypes.  
684 *Plant Physiology*, **146**, 2008-2019.
- 685 Jubault, M., Lariagon, C., Tacconat, L., Renou, J. P., Gravot, A., Delourme, R., *et al.* (2013)  
686 Partial resistance to clubroot in Arabidopsis is based on changes in the host primary



- 687 metabolism and targeted cell division and expansion capacity. *Funct Integr*  
688 *Genomics*, **13**, 191-205.
- 689 Kageyama, K. and Asano, T. (2009) Life Cycle of Plasmodiophora brassicae. *J Plant Growth*  
690 *Regul*, **28**, 203-211.
- 691 Käll, L., Krogh, A. and Sonnhammer, E. L. L. (2004) A combined transmembrane topology  
692 and signal peptide prediction method. *J Mol Biol*, **338**, 1027-1036.
- 693 Kazan, K. and Lyons, R. (2014) Intervention of Phytohormone Pathways by Pathogen  
694 Effectors. *Plant Cell*, **26**, 2285-2309.
- 695 Kazan, K. and Manners, J. M. (2012) JAZ repressors and the orchestration of phytohormone  
696 crosstalk. *Trends Plant Sci*, **17**, 22-31.
- 697 Klessig, D. F., Choi, H. W. and Dempsey, D. A. (2018) Systemic Acquired Resistance and  
698 Salicylic Acid: Past, Present and Future. *Mol Plant Microbe Interact*.
- 699 Kolde, R. (2015) pheatmap: Pretty Heatmaps. R package version 1.0.8.
- 700 Krogh, A., Larsson, B., von Heijne, G. and Sonnhammer, E. L. (2001) Predicting  
701 transmembrane protein topology with a hidden Markov model: application to  
702 complete genomes. *J Mol Biol*, **305**, 567-580.
- 703 Lahlali, R., Song, T., Chu, M., Yu, F., Kumar, S., Karunakaran, C., *et al.* (2017) Evaluating  
704 Changes in Cell-Wall Components Associated with Clubroot Resistance Using  
705 Fourier Transform Infrared Spectroscopy and RT-PCR. *International Journal of*  
706 *Molecular Sciences*, **18**, 2058.
- 707 Lemarié, S., Robert-Seilaniantz, A., Lariagon, C., Lemoine, J., Marnet, N., Jubault, M., *et al.*  
708 (2015) Both the jasmonic acid and the salicylic acid pathways contribute to resistance  
709 to the biotrophic clubroot agent Plasmodiophora brassicae in Arabidopsis. *Plant Cell*  
710 *Physiol*, **56**.
- 711 Li, B. and Dewey, C. N. (2011) RSEM: accurate transcript quantification from RNA-Seq data  
712 with or without a reference genome. *BMC Bioinformatics*, **12**, 323.
- 713 Lin, W. W., Lu, D. P., Gao, X. Q., Jiang, S., Ma, X. Y., Wang, Z. H., *et al.* (2013) Inverse  
714 modulation of plant immune and brassinosteroid signaling pathways by the receptor-  
715 like cytoplasmic kinase BIK1. *P Natl Acad Sci USA*, **110**, 12114-12119.
- 716 Liu, S., Liu, Y., Yang, X., Tong, C., Edwards, D., Parkin, I. A., *et al.* (2014) The Brassica  
717 oleracea genome reveals the asymmetrical evolution of polyploid genomes. *Nat*  
718 *Commun*, **5**, 3930.
- 719 Lohse, M., Nagel, A., Herter, T., May, P., Schroda, M., Zrenner, R., *et al.* (2014) Mercator: a  
720 fast and simple web server for genome scale functional annotation of plant sequence  
721 data. *Plant Cell Environ*, **37**, 1250-1258.
- 722 Lovelock, D. A., Donald, C. E., Conlan, X. A. and Cahill, D. M. (2013) Salicylic acid  
723 suppression of clubroot in broccoli (Brassica oleracea var. italica) caused by the  
724 obligate biotroph Plasmodiophora brassicae. *Australas Plant Path*, **42**, 141-153.
- 725 Lovelock, D. A., Sola, I., Marschollek, S., Donald, C. E., Rusak, G., van Pee, K. H., *et al.*  
726 (2016) Analysis of salicylic acid-dependent pathways in Arabidopsis thaliana  
727 following infection with Plasmodiophora brassicae and the influence of salicylic acid  
728 on disease. *Mol Plant Pathol*, **17**, 1237-1251.
- 729 Ludwig-Müller, J., Jülke, S., Geiß, K., Richter, F., Mithöfer, A., Šola, I., *et al.* (2015) A novel  
730 methyltransferase from the intracellular pathogen Plasmodiophora brassicae  
731 methylates salicylic acid. *Mol Plant Pathol*, **16**.
- 732 Ludwig-Müller, J., Prinsen, E., Rolfe, S. A. and Scholes, J. D. (2009) Metabolism and Plant  
733 Hormone Action During Clubroot Disease. *J Plant Growth Regul*, **28**, 229-244.
- 734 Malinowski, R., Novák, O., Borhan, M. H., Spíchal, L., Strnad, M. and Rolfe, S. A. (2016)  
735 The role of cytokinins in clubroot disease. *European Journal of Plant Pathology*,  
736 **145**, 543-557.
- 737 McNeece, B. T., Pant, S. R., Sharma, K., Niruala, P., Lawrence, G. W. and Klink, V. P.  
738 (2017) A Glycine max homolog of NON-RACE SPECIFIC DISEASE  
739 RESISTANCE 1 (NDR1) alters defense gene expression while functioning during a  
740 resistance response to different root pathogens in different genetic backgrounds.  
741 *Plant Physiol Biochem*, **114**, 60-71.

- 742 Mochizuki, S., Sugimoto, K., Koeduka, T. and Matsui, K. (2016) Arabidopsis lipoxygenase 2  
743 is essential for formation of green leaf volatiles and five-carbon volatiles. *Febs Lett*,  
744 **590**, 1017-1027.
- 745 Moriya, Y., Itoh, M., Okuda, S., Yoshizawa, A. C. and Kanehisa, M. (2007) KAAS: an  
746 automatic genome annotation and pathway reconstruction server. *Nucleic Acids Res*,  
747 **35**, W182-185.
- 748 Müller, P. and Hilgenberg, W. (1986) Isomers of zeatin and zeatin riboside in clubroot tissue:  
749 evidence for trans-zeatin biosynthesis by Plasmodiophora brassicae. *Physiologia*  
750 *Plantarum*, **66**, 245-250.
- 751 Neuhauser, S., Kirchmair, M., Bulman, S. and Bass, D. (2014) Cross-kingdom host shifts of  
752 phytoxyid parasites. *BMC evolutionary biology*, **14**, 33.
- 753 Nielsen, H. (2017) Predicting Secretory Proteins with SignalP. In: *Protein Function*  
754 *Prediction: Methods and Protocols*. (Kihara, D., ed.). New York, NY: Springer New  
755 York, pp. 59-73.
- 756 Park, S. W., Kaimoyo, E., Kumar, D., Mosher, S. and Klessig, D. F. (2007) Methyl salicylate  
757 is a critical mobile signal for plant systemic acquired resistance. *Science*, **318**, 113-  
758 116.
- 759 Pieterse, C. M., Van der Does, D., Zamioudis, C., Leon-Reyes, A. and Van Wees, S. C.  
760 (2012) Hormonal modulation of plant immunity. *Annu Rev Cell Dev Biol*, **28**, 489-  
761 521.
- 762 R Core Team (2016) R: A Language and Environment for Statistical Computing. Vienna,  
763 Austria: R Foundation for Statistical Computing.
- 764 Robinson, M. D., McCarthy, D. J. and Smyth, G. K. (2010) edgeR: a Bioconductor package  
765 for differential expression analysis of digital gene expression data. *Bioinformatics*,  
766 **26**, 139-140.
- 767 Rolfe, S. A., Strelkov, S. E., Links, M. G., Clarke, W. E., Robinson, S. J., Djavaheri, M., *et*  
768 *al.* (2016) The compact genome of the plant pathogen Plasmodiophora brassicae is  
769 adapted to intracellular interactions with host Brassica spp. *BMC Genomics*, **17**, 1-15.
- 770 Saleh, A., Withers, J., Mohan, R., Marques, J., Gu, Y., Yan, S., *et al.* (2015) Posttranslational  
771 Modifications of the Master Transcriptional Regulator NPR1 Enable Dynamic but  
772 Tight Control of Plant Immune Responses. *Cell Host Microbe*, **18**, 169-182.
- 773 Schuller, A., Kehr, J. and Ludwig-Muller, J. (2014) Laser microdissection coupled to  
774 transcriptional profiling of Arabidopsis roots inoculated by Plasmodiophora brassicae  
775 indicates a role for brassinosteroids in clubroot formation. *Plant Cell Physiol*, **55**,  
776 392-411.
- 777 Schwelm, A., Badstober, J., Bulman, S., Desoignies, N., Etemadi, M., Falloon, R. E., *et al.*  
778 (2018) Not in your usual Top 10: protists that infect plants and algae. *Mol Plant*  
779 *Pathol*, **19**, 1029-1044.
- 780 Schwelm, A., Fogelqvist, J., Knaust, A., Julke, S., Lilja, T., Bonilla-Rosso, G., *et al.* (2015)  
781 The Plasmodiophora brassicae genome reveals insights in its life cycle and ancestry  
782 of chitin synthases. *Scientific reports*, **5**, 11153.
- 783 Siemens, J., Bulman, S., Rehn, F. and Sundelin, T. (2009) Molecular Biology of  
784 Plasmodiophora brassicae. *J Plant Growth Regul*, **28**, 245-251.
- 785 Siemens, J., Gonzalez, M. C., Wolf, S., Hofmann, C., Greiner, S., Du, Y., *et al.* (2011)  
786 Extracellular invertase is involved in the regulation of clubroot disease in Arabidopsis  
787 thaliana. *Mol Plant Pathol*, **12**, 247-262.
- 788 Siemens, J., Keller, I., Sarx, J., Kunz, S., Schuller, A., Nagel, W., *et al.* (2006) Transcriptome  
789 analysis of Arabidopsis clubroots indicate a key role for cytokinins in disease  
790 development. *Mol Plant Microbe Interact*, **19**, 480-494.
- 791 Song, T., Chu, M., Lahlali, R., Yu, F. and Peng, G. (2016) Shotgun Label-free Proteomic  
792 Analysis of Clubroot (Plasmodiophora brassicae) Resistance Conferred by the Gene  
793 Rcr1 in Brassica rapa. *Front Plant Sci*, **7**, 1013.
- 794 Sun, Y., Veerabomma, S., Abdel-Mageed, H. A., Fokar, M., Asami, T., Yoshida, S., *et al.*  
795 (2005) Brassinosteroid regulates fiber development on cultured cotton ovules. *Plant*  
796 *Cell Physiol*, **46**, 1384-1391.

- 797 Takahashi, H., Muraoka, S., Ito, K., Mitsui, T., Hori, H. and Kiso, A. (2001) Resting Spore of  
798 Plasmodiophora brassicae Proliferates Only in the Callus of Clubroot Disease-  
799 Susceptible Turnip but Increases the PAL Activity in the Callus of Clubroot Disease-  
800 Resistant Turnip. *Plant Biotechnology*, **18**, 267-274.
- 801 van Verk, M. C., Bol, J. F. and Linthorst, H. J. (2011) WRKY transcription factors involved  
802 in activation of SA biosynthesis genes. *BMC Plant Biol*, **11**, 89.
- 803 Vlot, A. C., Dempsey, D. A. and Klessig, D. F. (2009) Salicylic Acid, a multifaceted hormone  
804 to combat disease. *Annu Rev Phytopathol*, **47**, 177-206.
- 805 Wang, D., Amornsiripanitch, N. and Dong, X. (2006) A genomic approach to identify  
806 regulatory nodes in the transcriptional network of systemic acquired resistance in  
807 plants. *PLoS Pathog*, **2**, e123.
- 808 Wang, X., Wang, H., Wang, J., Sun, R., Wu, J., Liu, S., *et al.* (2011) The genome of the  
809 mesopolyploid crop species Brassica rapa. *Nat Genet*, **43**, 1035-1039.
- 810 Wasternack, C. and Hause, B. (2013) Jasmonates: biosynthesis, perception, signal  
811 transduction and action in plant stress response, growth and development. An update  
812 to the 2007 review in *Annals of Botany*. *Ann Bot*, **111**, 1021-1058.
- 813 Wickham, H. (2009) ggplot2: Elegant Graphics for Data Analysis. New York: Springer-  
814 Verlag.
- 815 Xu, L., Yang, H., Ren, L., Chen, W., Liu, L., Liu, F., *et al.* (2018) Jasmonic Acid-Mediated  
816 Aliphatic Glucosinolate Metabolism Is Involved in Clubroot Disease Development in  
817 Brassica napus L. *Front Plant Sci*, **9**, 750.
- 818 Yin, Y., Mao, X., Yang, J., Chen, X., Mao, F. and Xu, Y. (2012) dbCAN: a web resource for  
819 automated carbohydrate-active enzyme annotation. *Nucleic Acids Res*, **40**, W445-451.
- 820 Zhang, X., Liu, Y., Fang, Z., Li, Z., Yang, L., Zhuang, M., *et al.* (2016) Comparative  
821 Transcriptome Analysis between Broccoli (*Brassica oleracea* var. *italica*) and Wild  
822 Cabbage (*Brassica macrocarpa* Guss.) in Response to *Plasmodiophora brassicae*  
823 during Different Infection Stages. *Frontiers in Plant Science*, **7**.
- 824 Zhao, Y., Bi, K., Gao, Z., Chen, T., Liu, H., Xie, J., *et al.* (2017) Transcriptome Analysis of  
825 *Arabidopsis thaliana* in Response to *Plasmodiophora brassicae* during Early Infection.  
826 *Front Microbiol*, **8**, 673.
